# Supplementary material
Source: publisher site journal article supplement (https://www.dovepress.com/article/359132)
Supplement: Supplementary file 1 [file get_supplementary_file.php]

**Supplemental Material**

**Saudi Ministry of Health protocol for thromboprophylaxis in hospitalized COVID-19 patients (June 17, 2020) ****

- Thromboprophylaxis with low molecular weight heparin (LMWH) should be considered in ALL patients (including non-critically ill) who require hospital admission for COVID-19 infection, in the absence of any contraindications (active bleeding and platelet count less than 25 x 109/L; monitoring is advised in severe renal impairment; abnormal PT or APTT is not a contraindication)

| **D‐Dimer (mcg/mL)** | **Weight (Kg)** | **LMWH** |
| --- | --- | --- |
| <1 | <100 | Enoxaparin 40 mg once daily |
| 100 - 150 | Enoxaparin 40 mg twice daily |
| >150 | Enoxaparin 60 mg twice daily |
| >1 | <100 | Enoxaparin 40 mg twice daily |
| 100 - 150 | Enoxaparin 80 mg twice daily |
| >150 | Enoxaparin 120 mg twice daily |

** This protocol was released by Saudi MOH on June 17th, 2020. This protocol is no longer available online at the MOH website because it was replaced with the updated one. The old version of the protocol is available upon request from the corresponding author.

You can access the most updated Saudi MOH protocol for thromboprophylaxis in hospitalized COVID-19 that was changed to reflect the current guideline recommendations here:

<https://www.moh.gov.sa/Ministry/MediaCenter/Publications/Documents/MOH-therapeutic-protocol-for-COVID-19.pdf>

**Sensitivity analysis – including admission to ICU in the matching characteristics**

| **Table S1.** Patients’ characteristics from the main propensity score matching and the propensity score matching for sensitivity analysis | | | | | | | |
| --- | --- | --- | --- | --- | --- | --- | --- |
| **Patients’ characteristics** | **Overall**  **(n=3508)** | ***Main - matched groups*** | | | ***Sensitivity analysis – matched groups*** | | |
| **Standard**  **(n=711)** | **High-intensity**  **(n=711)** | ***p*-value*** | **Standard**  **(n=710)** | **High-intensity**  **(n=710)** | ***p*-value*** |
| **Age in years, mean (SD)** | 56.5 (15.3) | 57.3 (15.6) | 57.2 (14.4) | 0.93 | 57.5 (15.8) | 57.2 (14.5) | 0.70 |
| Age ≥ 65 | 1040 (29.6) | 222 (31.2) | 222 (31.2) | 1.00 | 225 (31.7) | 225 (31.7) | 1.00 |
| **Female gender** | 1086 (30.9) | 226 (31.8) | 191 (26.9) | **0.04** | 190 (26.8) | 190 (26.8) | 1.00 |
| **BMI (kg/m2), mean (SD) (n=2233)** | 28.5 (6.2) | 28.6 (5.8) | 29.6 (7.2) | **<0.01** | 28.8 (6.2) | 29.5 (7.1) | **0.03** |
| **Comorbidities** |  |  |  |  |  |  |  |
| Hypertension | 1653 (47.1) | 361 (50.8) | 367 (51.6) | 0.75 | 359 (50.6) | 373 (52.5) | 0.46 |
| Diabetes mellitus | 1900 (54.1) | 379 (53.3) | 406 (57.1) | 0.15 | 386 (54.4) | 406 (57.2) | 0.29 |
| History of cardiovascular disease | 594 (16.9) | 162 (22.8) | 131 (18.4) | **0.04** | 181 (25.5) | 135 (19.0) | **<0.01** |
| History of pulmonary disease | 403 (11.5) | 101 (14.2) | 92 (12.9) | 0.49 | 91 (12.8) | 90 (12.7) | 0.94 |
| Immunocompromised | 92 (2.6) | 21 (2.9) | 19 (2.7) | 0.75 | 25 (3.5) | 19 (2.7) | 0.36 |
| Obesity or severe obesity | 409 (11.7) | 260 (36.6) | 260 (36.6) | 1.00 | 258 (36.3) | 258 (36.3) | 1.00 |
| Active cancer | 87 (2.5) | 21 (2.9) | 17 (2.4) | 0.51 | 23 (3.2) | 17 (2.4) | 0.34 |
| **Patients with critical COVID-19 during hospitalization** | 1321 (37.7) | 371 (52.2) | 389 (54.7) | 0.20 | 364 (51.8) | 389 (54.8) | 0.10 |
| **ICU admission** | 1939 (55.2) | 482 (67.8) | 548 (77.1) | **<0.01** | 548 (77.2) | 546 (76.9) | 0.90 |
| **Oxygen therapy** | 3179 (90.6) | 686 (96.5) | 689 (96.9) | 0.66 | 683 (96.2) | 688 (96.9) | 0.47 |
| Nasal or face mask | 2668 (76) | 572 (80.5) | 554 (77.9) | 0.24 | 567 (79.9) | 554 (78.0) | 0.40 |
| CPAP | 160 (4.6) | 46 (6.5) | 40 (5.6) | 0.51 | 52 (7.3) | 43 (6.1) | 0.34 |
| High-flow face mask oxygen | 1328 (37.8) | 351 (49.4) | 380 (53.5) | 0.12 | 401 (54.7) | 388 (54.7) | 0.49 |
| BiPAP | 547 (15.6) | 141 (19.8) | 154 (21.7) | 0.40 | 139 (19.6) | 162 (22.8) | 0.14 |
| IMV | 1081 (30.8) | 274 (38.5) | 302 (42.5) | 0.13 | 300 (42.3) | 300 (42.3) | 1.00 |
| ECMO | 16 (0.5) | 3 (0.4) | 5 (0.7) | 0.48 | 5 (0.7) | 6 (0.9) | 0.76 |
| **Complications during hospital stay** |  |  |  |  |  |  |  |
| Sepsis | 852 (24.3) | 238 (33.5) | 226 (31.8) | 0.50 | 246 (34.7) | 226 (31.8) | 0.26 |
| Septic shock | 690 (19.7) | 196 (27.6) | 192 (27.0) | 0.81 | 201 (28.3) | 195 (27.5) | 0.72 |
| Bacterial pneumonia | 2170 (61.8) | 441 (62.0) | 450 (63.3) | 0.62 | 461 (64.9) | 448 (63.1) | 0.47 |
| ARDS | 1257 (35.8) | 277 (39.0) | 396 (55.7) | **<0.01** | 289 (40.7) | 391 (55.1) | **<0.01** |
| Arrhythmia | 228 (6.5) | 59 (8.3) | 42 (5.9) | 0.08 | 68 (9.5) | 40 (5.6) | **<0.01** |
| Acute kidney injury | 464 (13.2) | 106 (14.9) | 117 (16.5) | 0.42 | 113 (15.9) | 117 (16.5) | 0.77 |
| Hepatotoxicity | 71 (2) | 17 (2.4) | 9 (1.3) | 0.11 | 17 (2.4) | 8 (1.1) | 0.07 |
| Gastrointestinal perforation | 17 (0.5) | 6 (0.8) | 4 (0.6) | 0.53 | 5 (0.7) | 4 (0.6) | 0.74 |
| Multi-organ failure | 308 (8.8) | 76 (10.7) | 91 (12.8) | 0.22 | 79 (11.1) | 90 (12.7) | 0.37 |
| Results are presented as frequency (%) unless otherwise indicated.  * *p*-values were from student’s *t*-test for continuous variables and Chi-square test for categorical data; Numbers in bold represent significant results.  Abbreviations: ICU: Intensive Care Unit; CPAP: Continuous positive airway pressure; BiPAP: Bilevel positive airway pressure; IMV: Intubation and invasive mechanical ventilation; ECMO: Extracorporeal membrane oxygenation; ARDS: Acute respiratory distress syndrome; | | | | | | | |

| **Table S2.** Dosing strategies for thromboprophylaxis in the high-intensity group | | |
| --- | --- | --- |
| **Enoxaparin dose** | ***Before matching***  **(n=1517)** | ***Sensitivity analysis – matched groups***  **(n=710)** |
| 40 mg Enoxaparin BID | 1021 (67.3) | 510 (71.8) |
| 60 mg Enoxaparin BID | 278 (18.3) | 107 (15.1) |
| 80 mg Enoxaparin BID | 210 (13.8) | 89 (12.5) |
| 120 mg Enoxaparin BID | 8 (0.5) | 4 (0.6) |
| Results are presented as frequency (%). Abbreviations: BID: twice daily | | |

| **Table S3.** Primary and secondary outcomes for the sensitivity analysis – matched cohorts | | | | |
| --- | --- | --- | --- | --- |
| **Outcome** | **Standard**  **(n=710)** | **High-intensity**  **(n=710)** | **Mean difference**  **(95% CI)** | ***p-*value***** |
| **In-hospital mortality, no. (%)** | 251 (36.1) | 256 (35.4) | --- | 0.78 |
| **Hospital LOS (Days), mean (SD)** | 13.9 (12.7) | 15.7 (12.7) | 1.80 (0.47 – 3.12) | **<0.01** |
| **LOS in ICU (Days), mean (SD)** | 10.2 (12.2) | 12.6 (11.5) | 2.33 (0.90 – 3.80) | **<0.01** |
| * *p*-values were from *t*-test for continuous variables and chi-square test for categorical data; numbers in bold represent significant results.  Abbreviations: LOS: length of stay; ICU: intensive care unit | | | | |

| **Table S4.** In-hospital mortality stratified by patients’ BMI and ICU admission for the sensitivity analysis – matched cohorts | | | | |
| --- | --- | --- | --- | --- |
| **Variable** | **N=1420** | **Standard**  **(n=710)** | **High-intensity**  **(n=710)** | **OR (95% CI)** |
| **BMI** |  |  |  |  |
| < 30 | 904 | 167/452 (36.9) | 162/452 (35.8) | 1.05 (0.80 – 1.37) |
| ≥ 30 | 516 | 84/258 (32.6) | 94/258 (36.4) | 0.84 (0.58 – 1.21) |
| **ICU admission** |  |  |  |  |
| No | 326 | 2/164 (1.2) | 7/162 (4.3) | 3.66 (0.74 – 17.9) |
| Yes | 1094 | 244/548 (44.5) | 254/546 (46.5) | 0.92 (0.72 – 1.17) |
| Abbreviations: OR = odds ratio, CI = confidence interval; ICU: intensive care unit | | | | |
